# Supplementary material
Source: publisher figshare collection journal article supplement (https://gsajournals.figshare.com/articles/dataset/_/12724955)
Supplement: Supplementary file 1 [file 2]

## Sheet: Silencing experiments
URA3 active frequency
Strain	Repeat 1					Repeat2					Repeat 3
	Volume spread on YPD plate (10000 times diluted)(µl)	number of clones on YPD plate	Volume spread on URA- plate (UC2210 and tdTomato-Sir2 100 times diluted, Δsir2 and Sir2-tdTomato 10000 diluted)(µl)	Number of clones on URA- plate	Frequence (10^-3)	Volume spread on YPD plate (10000 times diluted)(µl)	number of clones on YPD plate	Volume spread on URA- plate (UC2210 and tdTomato-Sir2 100 times diluted, Δsir2 and Sir2-tdTomato 10000 diluted)(µl)	Number of clones on URA- plate	Frequence (10^-3)	Volume spread on YPD plate (10000 times diluted)(µl)	number of clones on YPD plate	Volume spread on URA- plate (UC2210 and tdTomato-Sir2 100 times diluted, Δsir2 and Sir2-tdTomato 10000 diluted)(µl)	Number of clones on URA- plate	Frequence (10^-3)
UCC2210	100	120	100	76	6.33333	100	125	100	103	8.24	100	123	100	97	7.88618
UCC2210:tdTomato-Sir2	100	130	100	150	11.5385	100	121	100	180	14.876	100	131	100	163	12.4427
UCC2210:Sir2-tdTomato	100	117	100	31	264.957	100	127	100	25	196.85	100	109	100	47	431.193
Δsir2	100	110	100	63	572.727	100	113	100	82	725.664	100	107	100	83	775.701
Sorting of tdTomato-Sir2
	Repeat 1						Repeat 2						Repeat 3
	Number of cells sorted on YPD plate	Number of clones on YPD plate	Number of cells sorted on URA- plate	Number of clones on URA- plate	Frequence (10^-3)	Viability	Number of cells sorted on YPD plate	Number of clones on YPD plate	Number of cells sorted on URA- plate	Number of clones on URA- plate	Frequence (10^-33)	Viability	Number of cells sorted on YPD plate	Number of clones on YPD plate	Number of cells sorted on URA- plate	Number of clones on URA- plate	Frequence (10^-3)	Viability
tdTomato-low	150	85	10000	73	12.8824	0.566667	150	93	10000	72	11.6129	0.62	150	90	10000	81	13.5	0.6
tdTomato-high	150	20	10000	18	13.5	0.133333	150	18	10000	17	14.1667	0.12	150	33	10000	27	12.2727	0.22
Strains/Population	URA3 active frequency			Mean	SD	CI
UCC2210	6.33333	8.24	7.88618	7.4865	1.01422	2.51947
UCC2210:tdTomato-Sir2	11.5385	14.876	12.4427	12.9524	1.72617	4.28805
UCC2210:Sir2-tdTomato	264.957	196.85	431.193	297.667	120.547	299.455
Δsir2	572.727	725.664	775.701	691.364	105.745	262.684
Low Sir2 expression subpopulation	12.8824	11.6129	13.5	12.6651	0.962127	2.39005	Test
High Sir2 expression subpopulation	13.5	14.1667	12.2727	13.3131	0.960698	2.38651	0.612935
Population	Viability			Mean	SD	CI
Low Sir2 expression subpopulation	0.566667	0.62	0.6	0.595556	0.026943	0.0669302	Test
High Sir2 expression subpopulation	0.133333	0.12	0.22	0.157778	0.0542969	0.134881	0.00622852
UCC2210 with an additional copy of SIR2
Strain	Repeat 1					Repeat 2					Repeat 3
	Volume spread on YPD plate (1000 times diluted)(µl)	number of clones on YPD plate	Volume spread on URA- plate (10 times diluted)(µl)	Number of clones on URA- plate	Frequence (10^-3)	Volume spread on YPD plate (1000 times diluted)(µl)	number of clones on YPD plate	Volume spread on URA- plate (10 times diluted)(µl)	Number of clones on URA- plate	Frequence (10^-3)	Volume spread on YPD plate (1000 times diluted)(µl)	number of clones on YPD plate	Volume spread on URA- plate (10 times diluted)(µl)	Number of clones on URA- plate	Frequence (10^-3)
UCC2210	100	689	100	88.6667	1.28689	100	409.667	100	88.6667	2.16436	100	485	100	81.6667	1.68385
UCC2210+SIR2inLEU2	100	384.667	100	69.3333	1.80243	100	321.333	100	69.3333	2.15768	100	311.333	100	40.3333	1.2955
Strain	URA3 active frequency			Mean	SD	CI
UCC2210	1.28689	2.16436	1.68385	1.7117	0.439399	1.09153	Test
UCC2210+SIR2inLEU2	1.80243	2.15768	1.2955	1.75187	0.433304	1.07639	0.892212

## Sheet: Viability on 5 subpopulations
Subpop	Exp 1	Exp2	Exp3	Mean	SD				For Pearson test:	Subpopulation expression level	Exp 1	Exp2	Exp3	Mean	SD
1	0.413333	0.66	0.32	0.464444	0.175668	T test 1 vs 5	0.0733613			0.1	0.413333	0.66	0.32	0.464444	0.175668
2	0.42	0.7	0.466667	0.528889	0.150012	T test 2 vs 5	0.0284006			0.3	0.42	0.7	0.466667	0.528889	0.150012
3	0.306667	0.56	0.44	0.435556	0.126725					0.5	0.306667	0.56	0.44	0.435556	0.126725
4	0.273333	0.513333	0.166667	0.317778	0.177555					0.7	0.273333	0.513333	0.166667	0.317778	0.177555
5	0.126667	0.293333	0.146667	0.188889	0.0910026					0.9	0.126667	0.293333	0.146667	0.188889	0.0910026
Control	0.353333	0.32	0.246667	0.306667	0.054569					Control	0.353333	0.32	0.246667	0.306667	0.054569
															Pearson test	-0.895015

## Sheet: Western blotting
Quantification Stain free replicate n°1
Strain	Volume (Int)	Adj. Vol. (Int)	Mean Bkgd. (Int)	Abs. Quant.	Rel. Quant.	# of Pixels	Min. Value (Int)	Max. Value (Int)	Mean Value (Int)	Std. Dev.	Area (mm2)
UCC2210	1 626 089 759,000000	899285957	3 714,000000	N/A	1	195693	1 127,000000	60 996,000000	8 309,391542	9 906,970082	304.079
UCC2210+SIR2inLEU2	1 544 113 552,000000	9.4808e+08	3 045,756156	N/A	1.05426	195693	993	60 138,000000	7 890,489450	6 761,830230	304.079
Quantification Stain free replicate n°2
Strain	Volume (Int)	Adj. Vol. (Int)	Mean Bkgd. (Int)	Abs. Quant.	Rel. Quant.	# of Pixels	Min. Value (Int)	Max. Value (Int)	Mean Value (Int)	Std. Dev.	Area (mm2)
UCC2210	1 975 489 452,000000	1.23186e+09	3 770,780195	N/A	1.36982	197209	1 046,000000	65 535,000000	10 017,237814	11 778,854977	306.434
UCC2210+SIR2inLEU2	1 871 420 157,000000	1.03998e+09	4 215,684211	N/A	1.15645	197225	924	37 058,000000	9 488,757292	7 598,242321	306.459
Quantification Sir2 replicate n°1
Strain	Volume (Int)	Adj. Vol. (Int)	Mean Bkgd. (Int)	Abs. Quant.	Rel. Quant.	# of Pixels	Min. Value (Int)	Max. Value (Int)	Mean Value (Int)	Std. Dev.	Area (mm2)
UCC2210	5 901 856,000000	510205	8 824,306452	N/A	1	611	7 197,000000	13 147,000000	9 659,338789	1 244,464589	15.2126
UCC2210+SIR2inLEU2	5 088 956,000000	924163	6 816,354839	N/A	1.81136	611	5 726,000000	13 497,000000	8 328,896890	1 866,878281	15.2126
Quantification Sir2 replicate n°2
Strain	Volume (Int)	Adj. Vol. (Int)	Mean Bkgd. (Int)	Abs. Quant.	Rel. Quant.	# of Pixels	Min. Value (Int)	Max. Value (Int)	Mean Value (Int)	Std. Dev.	Area (mm2)
UCC2210	4 689 433,000000	629338	5 759,000000	N/A	1.2335	705	5 447,000000	9 542,000000	6 651,678014	1 159,782440	17.553
UCC2210+SIR2inLEU2	5 021 996,000000	1.13088e+06	5 519,320313	N/A	2.21651	705	4 986,000000	11 735,000000	7 123,398582	1 964,535818	17.553
Normalization
Replicate 1
Strain	Adj. Vol. (Int)
UCC2210	0.000567344
UCC2210+SIR2inLEU2	0.000974773
Replicate 2
Strain	Adj. Vol. (Int)
UCC2210	0.000510885
UCC2210+SIR2inLEU2	0.0010874
Total
Strain	Mean	SD
UCC2210	0.000539115	3.99225e-05
UCC2210+SIR2inLEU2	0.00103109	7.96386e-05
								Example of stain-free staining

## Sheet: Recovery experiment
	Mean fluorescence level (a.u.)	SD
T0h-non sorted	15	0.134
T0h-low	6	0.075
T0h-high	37	0.033
T6h-non sorted	17	0.144
T6h-low	11	0.147
T6h-high	25	0.178
				T0h-non sorted	T0h-low	T0h-high	T6h-non sorted	T6h-low	T6h-high

## Sheet: Viability tdTomato-Tsl1
	Repeat 1			Repeat 2			Repeat 3
	Number of cells sorted on YPD plate	Number of clones on YPD plate	Viability	Number of cells sorted on YPD plate	Number of clones on YPD plate	Viability	Number of cells sorted on YPD plate	Number of clones on YPD plate	Viability
tdTomato-Sir2-low	500	235	0.47	500	191	0.382	500	192	0.384
tdTomato-Sir2-high	500	182	0.364	500	126	0.252	500	118	0.236
tdTomato-Tsl1-low	500	211	0.422	500	168	0.336	500	84	0.168
tdTomato-Tsl1-high	500	179	0.358	500	169	0.338	500	115	0.23
	Repeat 1	Repeat 2	Repeat 3	Mean	SD
tdTomato-Sir2-low	0.47	0.382	0.384	0.412	FALSE
tdTomato-Sir2-high	0.364	0.252	0.236	0.284	0.0697424		#VALUE!
tdTomato-Tsl1-low	0.422	0.336	0.168	0.308667	0.129187
tdTomato-Tsl1-high	0.358	0.338	0.23	0.308667	0.0688573
		T test Sir2	0.00891262
		T test Tsl1	0.651671
							tdTomato-Sir2-low		tdTomato-Sir2-high		tdTomato-Tsl1-low		tdTomato-Tsl1-high
Comparison YPD/SCD media
	Number of cells plated on YPD plate	Number of clones on YPD plate	Viability	SD	Number of cells plated on SCD plate	Number of clones on SCD plate	Viability	SD
tdTomato-Tsl1 strain	200	161.5	0.8075	0.0287228	200	152.75	0.76375	0.122772
