# Supplementary material
Source: publisher figshare collection journal article supplement (https://gsajournals.figshare.com/articles/dataset/_/12724955)
Supplement: Supplementary file 4 [file 2]

ACCATTTTTCCCTCATCGGCACATTAAAGCTGGATGACCATCCCA GTATCCAAAGGCGAAGAAGTCATCAAAGA  
ATTTATGAGATTCAAAGTTAGAATGGAAGGAAGCATGAATGGACATGAGTTCGAAATTGAAGGAGAAGGAGA  
AGGTAGACCATATGAGGGTACCCAAACAGCCAAGTTGAAGGTTACAAAGGGAGGTCCACTACCGTTTGCATG  
GGATATCCTGTCTCCTCAGTTTATGTATGGGAGCAAGGCTTATGTTAAACATCCAGCAGACATACCAGATTACA  
AGAAATTGAGTTTTCTGAAGGTTTTAAGTGGGAACGTGTCATGAACTTTGAAGATGGTGGGTTGGTTACTGT  
TACTCAAGATTGAGTTTACAGGATGGGACCTTGATATACAAGGTGAAAATGAGGGGTACAAATTTCCCTCCA  
GATGGGCCGTTATGCAGAAGAAAACCATGGGCTGGGAAGCATCCACTGAAAGGCTGTATCCAAGAGATGGT  
GTGTTGAAGGGTGAGATCCATCAAGCTCTAAACTGAAAGATGGTGGACATTATTTAGTTGAGTTTAAACCA  
TCTATATGGCGAAGAAGCCTGTGCAATTGCCTGGTTATTACTACGTAGATACGAAACTAGATATCACGTCACAC  
AACGAAGATTATACGATTGTCGAACAGTACGAGAGATCTGAGGGTAGGCATCATTTGTTCTTGGGCCATGGCA  
CAGGATCAACTGGTTCTGGTTCTTCAGGTACAGCTTCTTCTGAGGACAACAATATGGCTGTAATTAAGGAATTT  
ATGCGTTTTCAAAGTGAGAATGGAAGGTAGTATGAATGGCCACGAGTTTCGAAATAGAGGGTGAAGGGGAGGG  
TAGACCCTATGAAGGCACTCAAACCGCCAAGTTAAAAGTCACAAAGGGTGGGCCACTTCCATTTGCATGGGAC  
ATTTTATCACCCCAATTTATGTATGGTAGCAAAGCATACGTGAAACATCCTGCTGATATTCCTGACTATAAGAA  
GTTGTCCTTCCCCGAAGGATTCAAATGGGAAAGAGTCATGAATTTTCGAGGATGGAGGCTTAGTAACAGTGACT  
CAAGACTCTAGTTTGCAGGATGGTACGTTAATATACAAAGTTAAGATGAGAGGCACCAACTTTCCACCTGACG  
GCCCAGTAATGCAAAAGAAAACCTATGGGATGGGAAGCTTCAACTGAAAGGCTTTACCCAGAGATGGCGTTCT  
AAAAGGTGAAATACACCAAGCGTTAAAATTGAAAGACGGTGGACACTATCTTGTCGAGTTTAAACAATTTAT  
ATGGCCAAGAAACCGTTCACTACCAGGTTATTACTATGTAGACACAAAATTAGACATTACTTCGCATAATGA  
AGATTACACTATTGTTGAACAATACGAAAGATCCGAAGGTAGACATCACTTATTTCTTACGGTATGGATGAAC  
TGTATAAA CATATGAAATACGCCGTATCAAAGACTAGCGAAAATAAGGTTTCA
