# Supplementary material
Source: publisher figshare collection journal article supplement (https://gsajournals.figshare.com/articles/dataset/_/12724955)

Figure S5

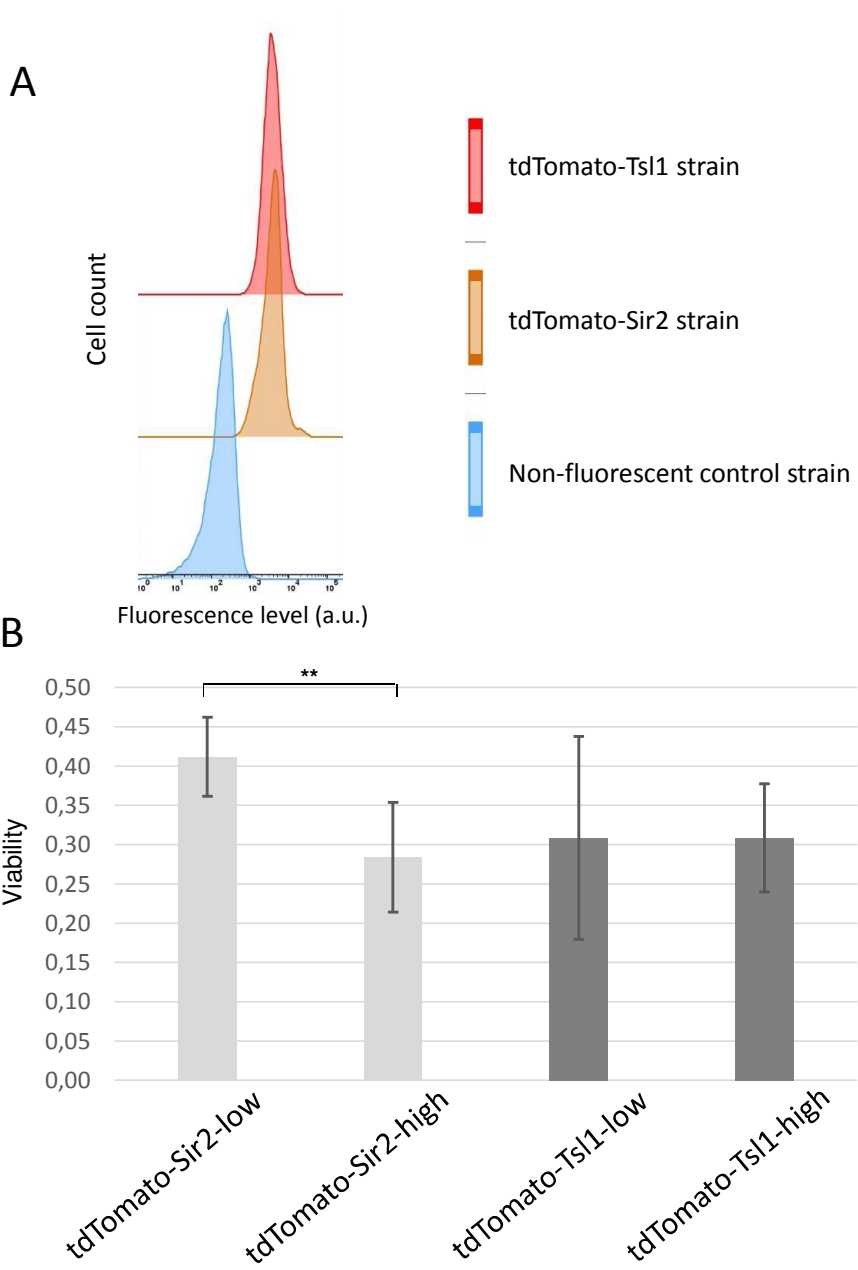

Supplement: Supplementary file 1 [file 2]

Figure S4

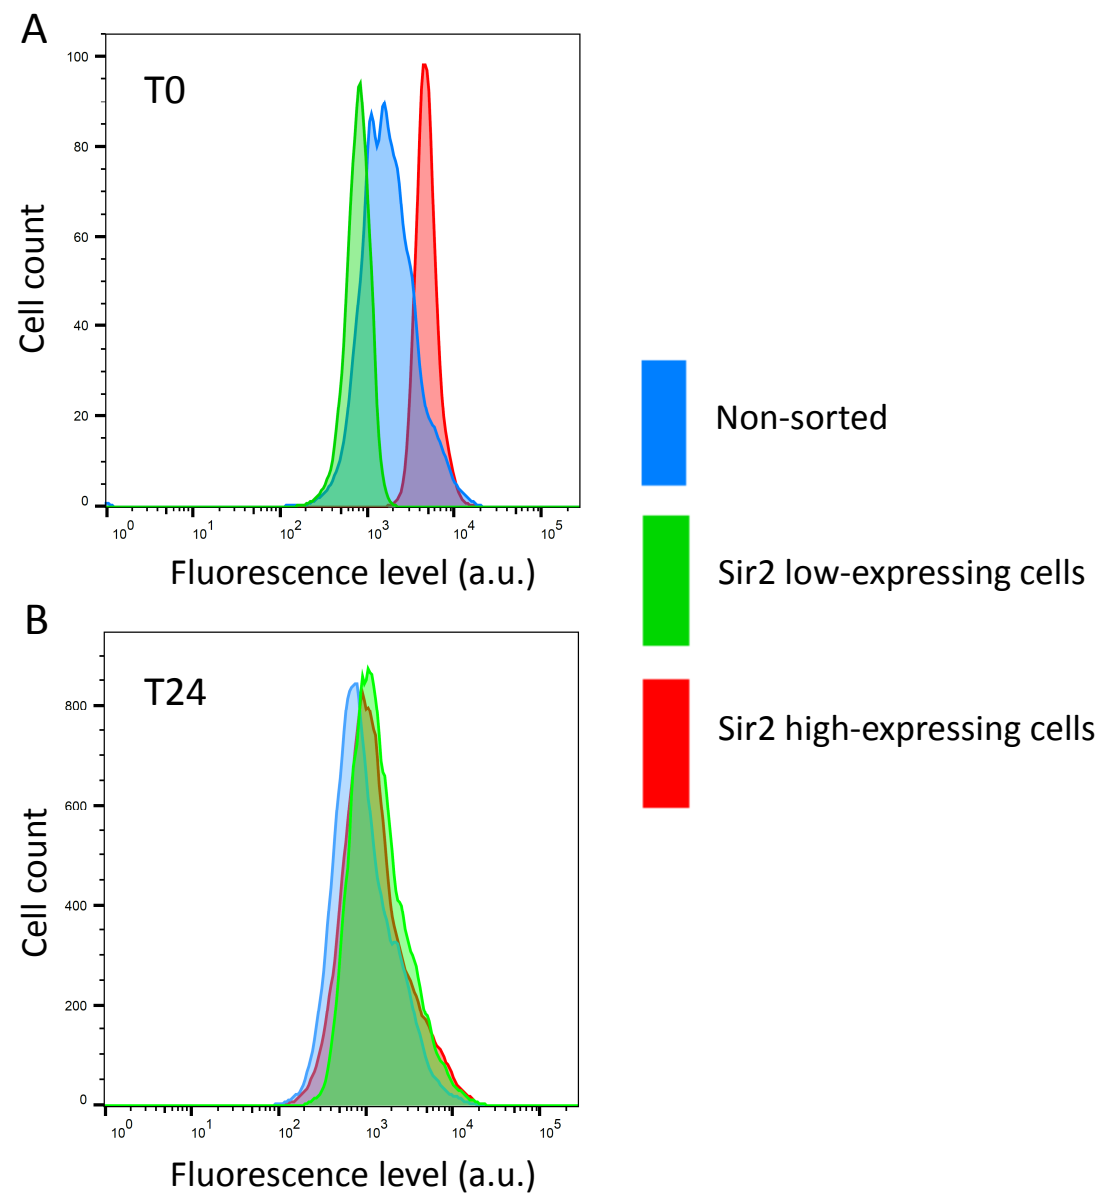

Supplement: Supplementary file 2 [file 2]

Figure S3

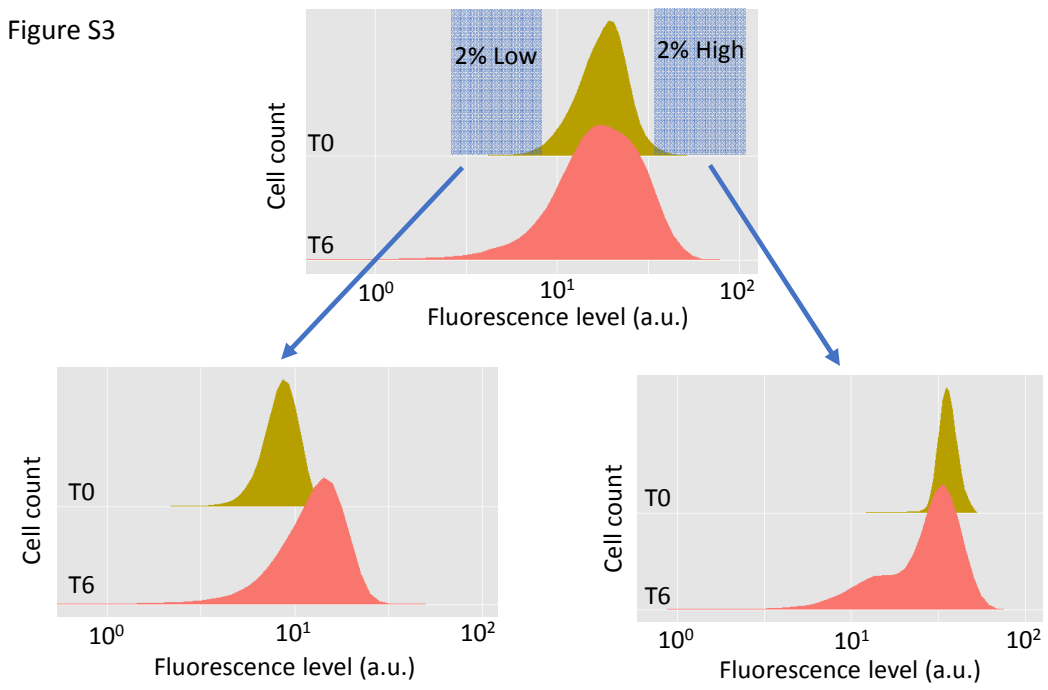

Supplement: Supplementary file 3 [file 2]

Figure S2

-ura plate

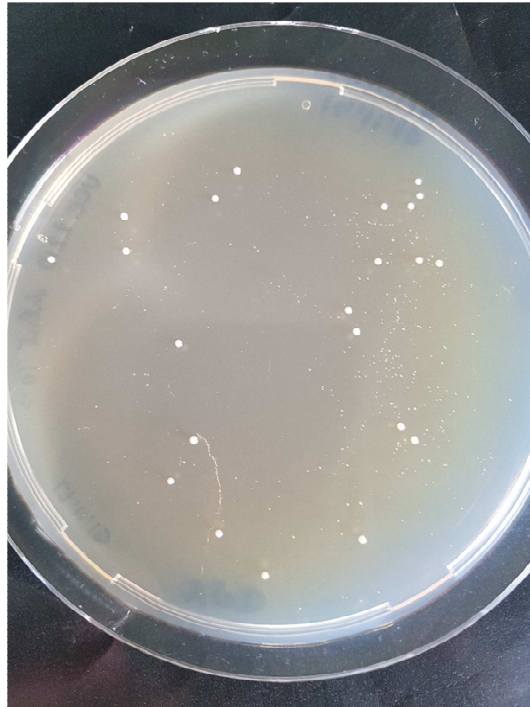

5-FOA plate

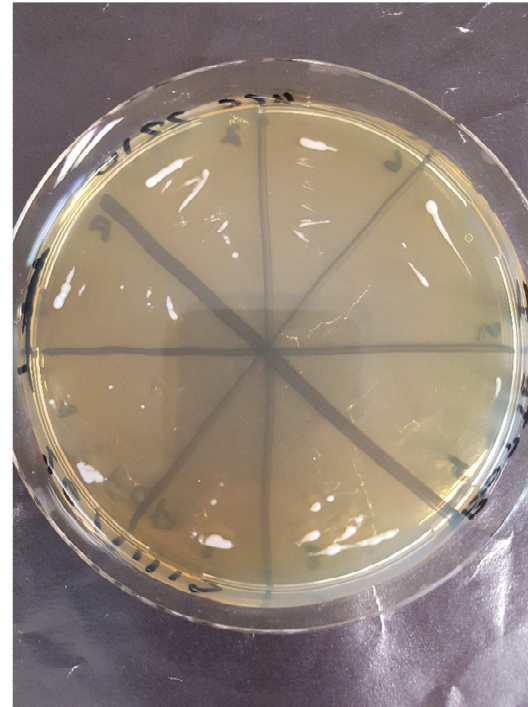

Supplement: Supplementary file 5 [file 2]
